# Supplementary material
Source: Springer Nature journal article supplement (https://www.springermedizin.de/resource/supplementary/13256_2010_1483_MOESM1_ESM.pdf/9647770)

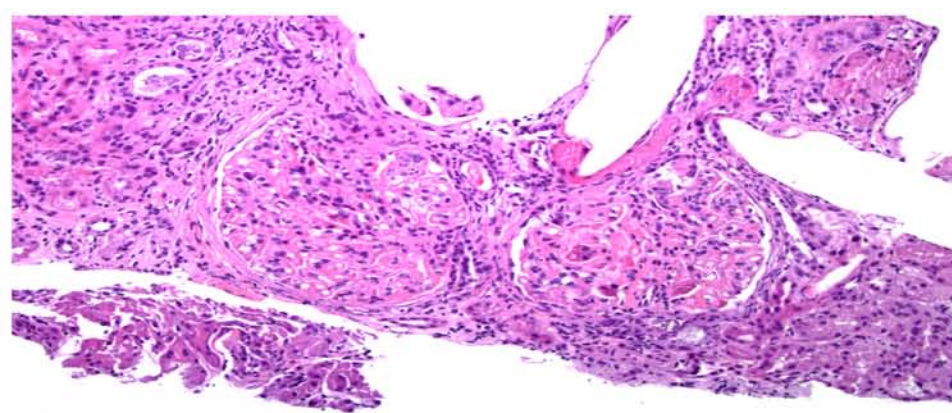**A**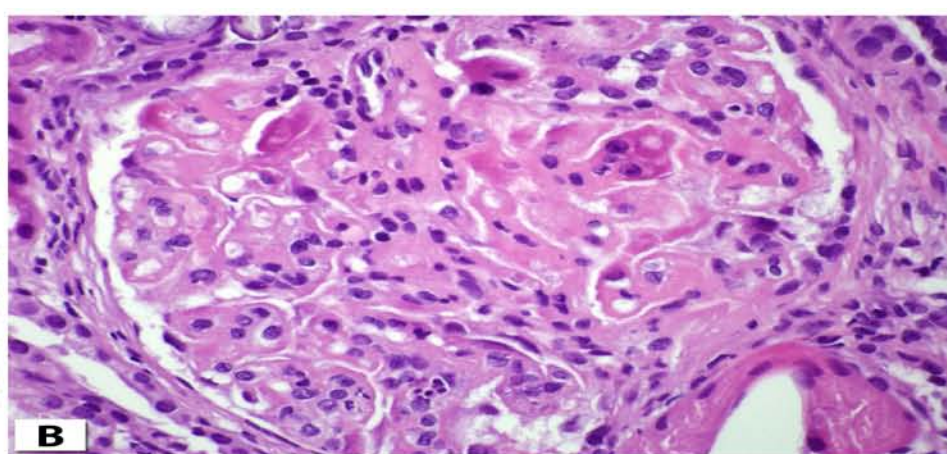**B**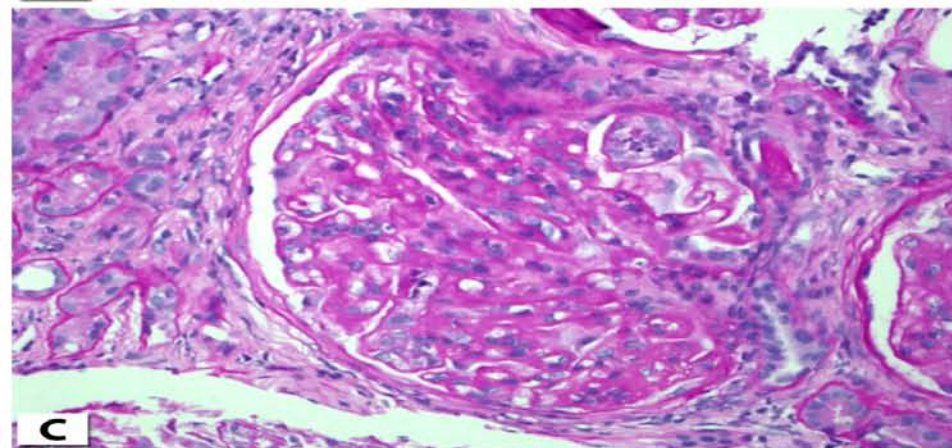**C**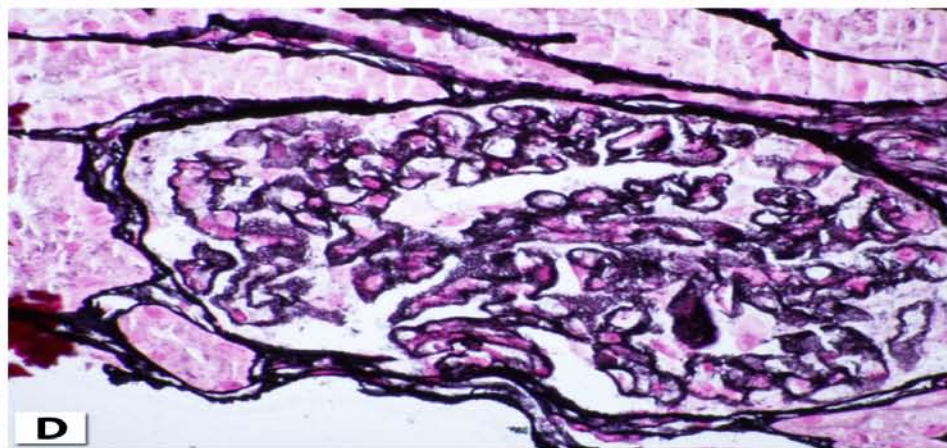**D**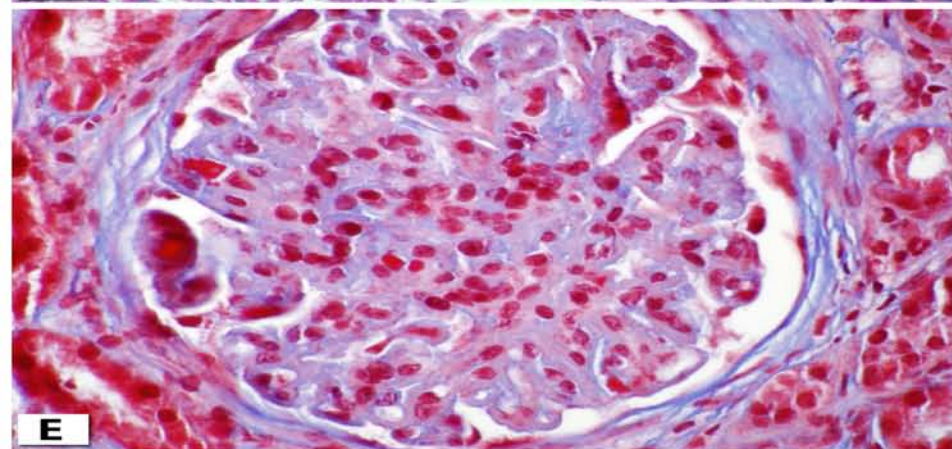**E**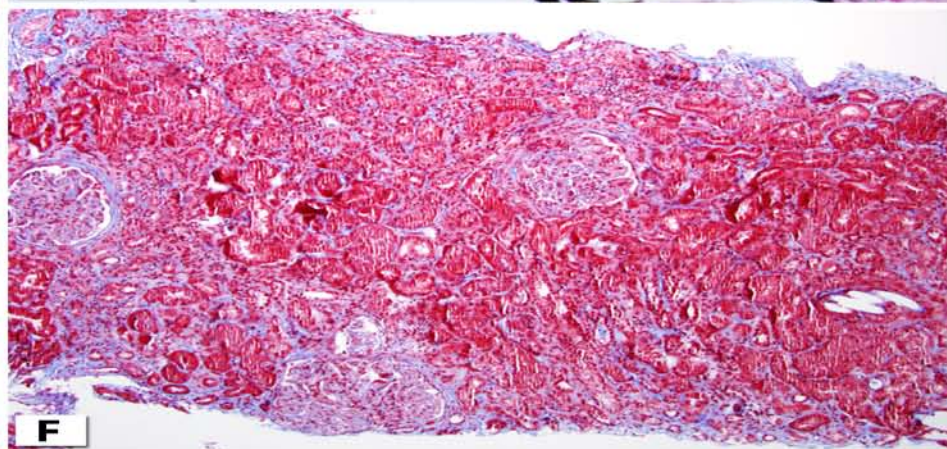**F**

Supplement: MOESM1 [file 9647770]
